# Supplementary material for: A Recombinant Turkey Herpesvirus Expressing the F Protein of Newcastle Disease Virus Genotype XII Generated by NHEJ-CRISPR/Cas9 and Cre-LoxP Systems Confers Protection against Genotype XII Challenge in Chickens
Source: MDPI journal article supplement (doi:10.3390/v14040793), 2022-04-11
Supplement: s1 [file s1]

*Supplementary Materials*

## **A Recombinant Turkey Herpesvirus Expressing the F Protein of Newcastle Disease Virus Genotype XII Generated by NHEJ-CRISPR/Cas9 and Cre-LoxP Systems Confers Protection against Genotype XII Challenge in Chickens**

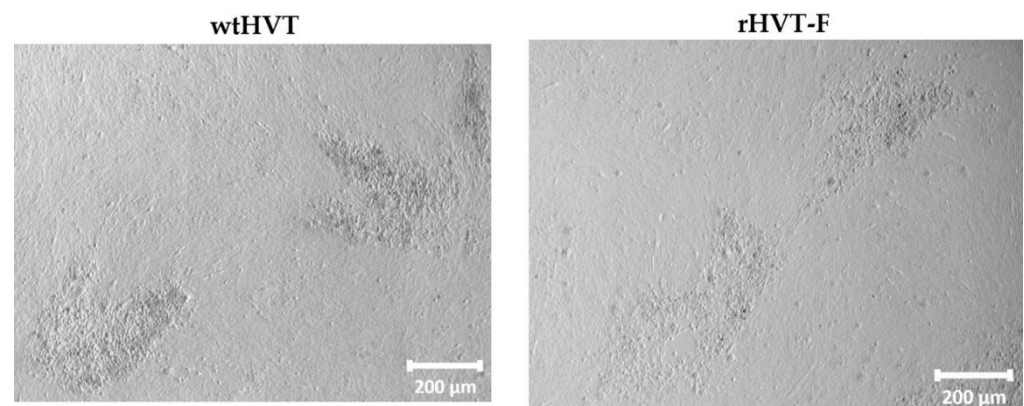

**Figure S1.** Plaque size comparison between wtHVT and rHVT-F virus. CEF cells were infected with the rHVT-F and wtHVT, then 5 days post-infection the plaques were observed by bright-field microscopy: 50× magnification, all bars represent 200  $\mu\text{m}$ .
